# Supplementary material for: Coating-free TiO2@β-SiC alveolar foams as a ready-to-use composite photocatalyst with tunable adsorption properties for water treatment
Source: RSC Adv. 2020 Jan 22;10(7):3817–25. doi: 10.1039/c9ra09553e (PMC9048602; doi:10.1039/c9ra09553e)
Supplement: RA-010-C9RA09553E-s001 [file RA-010-C9RA09553E-s001.pdf]

## Supplementary material

### Coating-free TiO<sub>2</sub>@β-SiC alveolar foams as ready-to-use composite photocatalyst with tunable adsorption properties for water treatment

Marisa Rico-Santacruz<sup>1</sup>, Patricia García-Muñoz <sup>1\*</sup>, Clément Marchal<sup>1</sup>, Nelly Batail<sup>2</sup>, Charlotte Pham<sup>2</sup>, Didier Robert<sup>1</sup>, Nicolas Keller<sup>1\*</sup>

*(1) Institut de Chimie et Procédés pour l'Energie, l'Environnement et la Santé (ICPEES), CNRS/University of Strasbourg, 25 rue Becquerel 67087 Strasbourg, France.*

*(2) SICAT SARL, 20 Place des Halles, 67000 Strasbourg, France.*

*Corresponding authors(\*): garciamunoz@unistra.fr; nkeller@unistra.fr*

**Figure S1.** (A) Dark adsorption experiments performed on the TiO<sub>2</sub>@β-SiC composite foams with different TiO<sub>2</sub> wt.% contents and calcined at 600°C ; (B) Diuron photodegradation kinetics obtained on those TiO<sub>2</sub>@β-SiC composite foams, with the corresponding apparent kinetic rate constant (pseudo first order reaction rate).

**Figure S2.** Spectral distribution of the simulated solar light.

**Figure S3.** Calibration curve expressing the influence of the TiO<sub>2</sub> concentration on the apparent rate constant for the chlorophenol degradation (pseudo first order reaction). [4-CP]<sub>0</sub> = 20 mg/L; T=25°C; UV-A irradiance of 60 W m<sup>-2</sup>.

**Figure S4.** A) Dark adsorption experiments performed on TiO<sub>2</sub>@β-SiC composite foams varying in terms of residual carbon content for different initial Diuron concentrations. B) Amount of diuron adsorbed as a function of the residual carbon content in wt.% for different initial Diuron concentrations.

## Figure S1

For a preliminary study,  $\text{TiO}_2@\beta\text{-SiC}$  composite foams were prepared with a  $\text{TiO}_2$  content of 11 wt.%, 20 wt.% and 33 wt.% on the  $\beta\text{-SiC}$  skeleton foam during the step 3 of the sequential multi-step carburization SMS method. The  $\text{TiO}_2@\beta\text{-SiC}$  composite foams obtained after final calcination at  $600^\circ\text{C}$  displayed similar Diuron adsorption behavior in the dark independently of the  $\text{TiO}_2$  content, as depicted in Fig. S1A. By contrast, Fig. S1B evidenced the superiority of the composite foam with a 20 wt.%  $\text{TiO}_2$  content in terms of Diuron removal, as evidenced by the higher apparent kinetic rate constant for Diuron degradation, calculated at  $3.1 \times 10^{-3} \text{ min}^{-1}$ . Therefore, the main part of the work was further performed on composite foams obtained by impregnating the  $\beta\text{-SiC}$  skeleton foam with  $\text{TiO}_2$  at a 20 wt.% content.

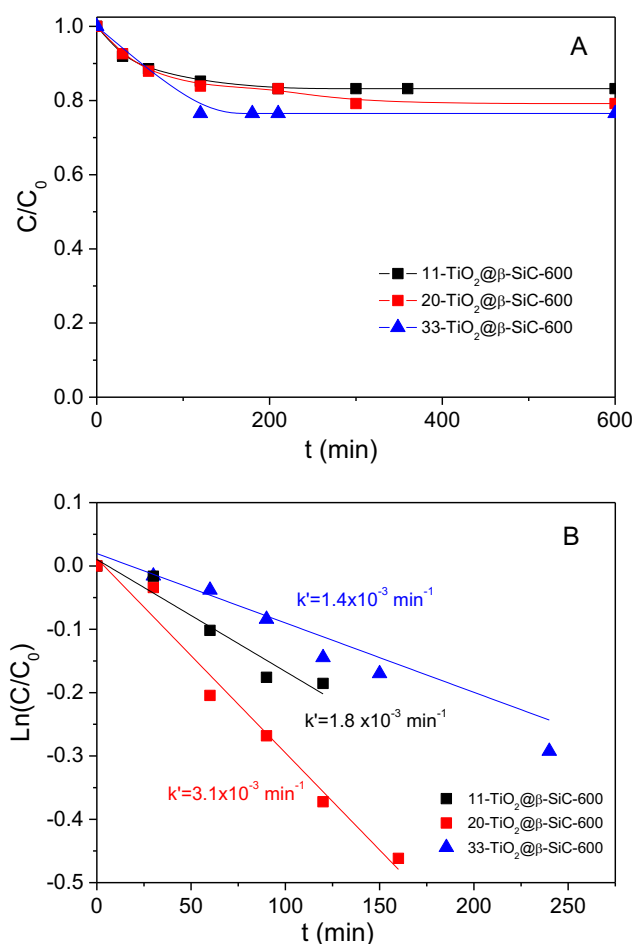

**Figure S1 (A)** Dark adsorption experiments performed on the  $\text{TiO}_2@\beta\text{-SiC}$  composite foams with different  $\text{TiO}_2$  wt.% contents and calcined at  $600^\circ\text{C}$  ; **(B)** Diuron photodegradation kinetics obtained on those  $\text{TiO}_2@\beta\text{-SiC}$  composite foams, with the corresponding apparent kinetic rate constant (pseudo first order reaction rate).

**Figure S2**

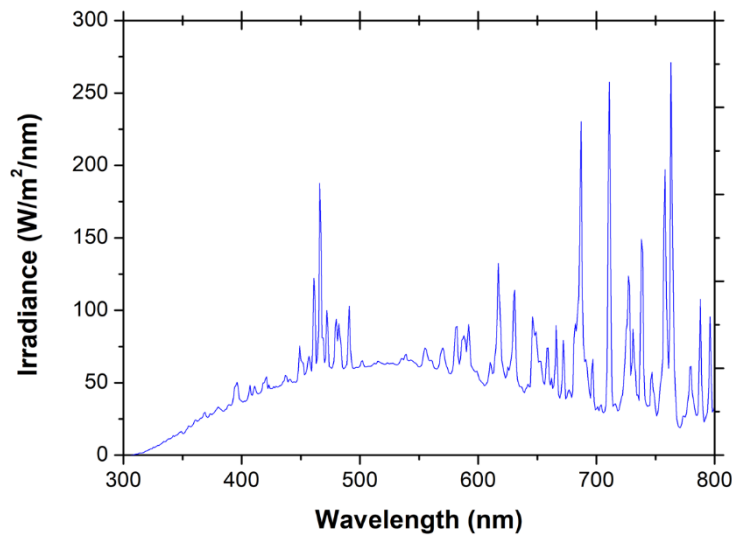

**Figure S2.** Spectral distribution of the simulated solar light.

Measurements have been performed using a wideband RPS900-W rapid portable spectroradiometer from International Light Technology.

**Figure S3**

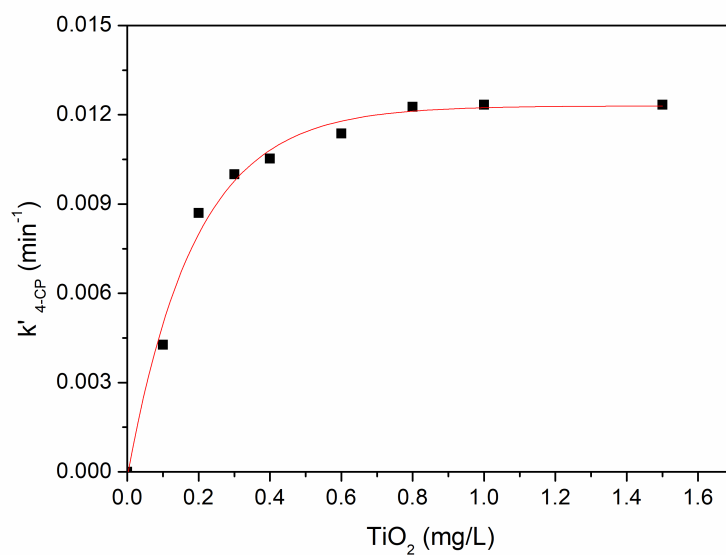

**Figure S3.** Calibration curve expressing the influence of the TiO<sub>2</sub> concentration on the apparent rate constant for the chlorophenol degradation (pseudo first order reaction). [4-CP]<sub>0</sub> = 20 mg/L; T=25°C; UV-A irradiance of 60 W m<sup>-2</sup>.

# Figure S4

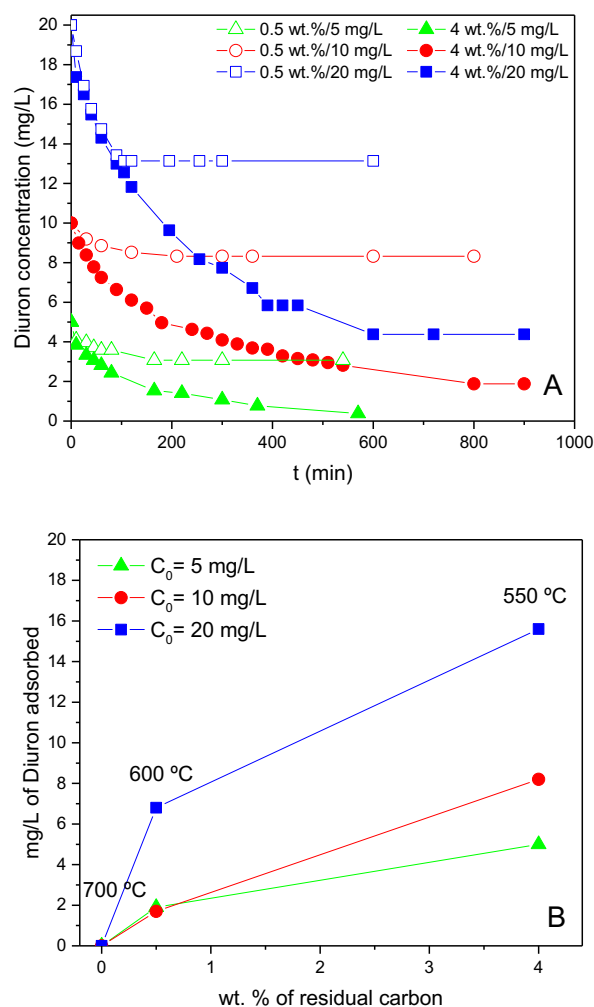

**Figure S4. A)** Dark adsorption experiments performed on  $\text{TiO}_2@ \beta\text{-SiC}$  composite foams varying in terms of residual carbon content for different initial Diuron concentrations. **B)** Amount of Diuron adsorbed as a function of the residual carbon content in wt.% for different initial Diuron concentrations.
